# Supplementary material for: To Detach, Migrate, Adhere, and Metastasize: CD97/ADGRE5 in Cancer
Source: MDPI journal article supplement (doi:10.3390/cells11091538), 2022-05-04
Supplement: s1 [file s1]

## To detach, migrate, adhere, invade and metastasize: CD97/ADGRE5 in cancer

### Supplementary Materials

Table S1. Expression of CD97 in carcinomas

| tissue       | tumor                       | literature | method                                                                                           | result, conclusion                                                                                                                             |
|--------------|-----------------------------|------------|--------------------------------------------------------------------------------------------------|------------------------------------------------------------------------------------------------------------------------------------------------|
| esophagus    | esophageal Ca               | [1]        | IH CD97 Ca vs adjacent normal (n=13 patients)                                                    | 10/13 Ca CD97+                                                                                                                                 |
|              |                             | [2]        | genome-wide methylation study (epigenomics)                                                      | ADGRE5 is 1/23 genes with relevance in tumor progression/metastasis                                                                            |
| stomach      | gastric Ca                  | [1]        | IH CD97 Ca vs adjacent normal (n=50 patients)                                                    | 44/50 Ca CD97+                                                                                                                                 |
|              |                             | [3]        | IH CD97 Ca vs adjacent normal (n=35 patients)                                                    | high CD97 at tumor margin, role of CD97 in tumor invasion                                                                                      |
| intestine    | colorectal Ca               | [4]        | IH CD97 Ca vs adjacent normal (n=81 patients)                                                    | ↑CD97 in Ca; 75/81 Ca CD97+; CD97 enhanced at the invasion front                                                                               |
|              | rectal Ca                   | [5]        | IH CD97 Ca vs adjacent normal (n= 71 patients)                                                   | ↑CD97 in Ca, high CD97 at invasion front is associated with poor survival                                                                      |
| liver        | HCC                         | [6]        | IH CD97 Ca vs adjacent normal (n=140)                                                            | ↑CD97 in HCCs is positively correlated with poor prognosis and negatively correlated with GRK6                                                 |
|              |                             | [6]        | <i>in vivo</i> xenograft model using Huh7 cells with ectopic CD97                                | ectopic CD97 ↑lung metastasis                                                                                                                  |
|              |                             | [6]        | Huh7 and SMMC-7721 cells with ectopic CD97 or GRK6, <i>in vitro</i>                              | ectopic CD97 ↑MMP2 and MMP9 secretion in the absence of GRK6                                                                                   |
|              | cholangio Ca (intrahepatic) | [7]        | IH CD97; bile sCD97 ELISA (n=71 Ca vs n=10 hepatolithiasis patients)                             | 54/71 Ca CD97+, CD97 and sCD97 independent risk factor for survival                                                                            |
| gall bladder | gall bladder Ca             | [8]        | IH CD97 Ca vs adjacent normal (n=138 patients)                                                   | 96/138 Ca CD97+, enhanced at invasive front; CD97 independent risk factor for overall survival                                                 |
| pancreas     | PDAC                        | [9]        | IH(P) CD97 (n= 50 Ca, n=36 normal pancreatic), but the used CD97 Ab is not approved for paraffin | 6/50 Ca CD97+, only poorly differentiated PDCA                                                                                                 |
|              |                             | [1]        | IH(cryo) CD97 (n=18 patients)                                                                    | 14/18 Ca CD97+                                                                                                                                 |
|              |                             | [10]       | IH CD97 vs adjacent normal (n=37 patients); CD97 Ab: polyclonal, Santa Cruz                      | ↑CD97 in Ca vs. normal, 37/37 Ca CD97+, CD97 is related to invasion/metastasis and prognosis                                                   |
| kidney       | ccRCC                       | [11]       | urinary N-glycoproteome (n = 15 pT1, n = 15 pT3 patients, n=15 controls)                         | CD97 is 1/3 glycoproteins ↑ in urine of patients with higher pT                                                                                |
| thyroid      | thyroid Ca                  | [12]       | IH CD97 (n=10 differentiated, n=12 undifferentiated; n=11 normal thyroid)                        | CD97 induction in Ca; ↑CD97 correlates to dedifferentiation                                                                                    |
|              |                             | [13]       | IH CD97 (n=29 patients)                                                                          | CD97 correlates to pTNM                                                                                                                        |
|              |                             |            | <i>in vitro</i> CD97 regulation by growth factors in FTC-133 cells                               | EGF ↑number of CD97+ cells, retinoic acid ↓number of CD97+ cells                                                                               |
|              |                             | [14]       | qRT-PCR, treatment thyroid Ca cell lines                                                         | nutritional (beneficial) polyphenol phytochemicals ↓ADGRE5                                                                                     |
|              |                             | [15]       | IH CD97 tissue array                                                                             | percentage of CD97+ tumors higher in poorly/undifferentiated vs papillary/follicular Ca                                                        |
|              |                             | [15]       | <i>in vivo</i> : thyroglobulin- promotor driven <i>Adgre5</i> combined with                      | <i>Thrb</i> <sup>PV/PV</sup> mice: CD97 induction in Ca; <i>Thrb</i> <sup>PV/PV</sup> × <i>Adgre5</i> : ↑vascular invasion and lung metastasis |

|             |                              |      |                                                                                                                                               |                                                                                                                                  |
|-------------|------------------------------|------|-----------------------------------------------------------------------------------------------------------------------------------------------|----------------------------------------------------------------------------------------------------------------------------------|
|             |                              |      | Thrb <sup>PV</sup> (thyroid follicular carcinogenesis), mice                                                                                  |                                                                                                                                  |
|             | medullary thyroid Ca         | [16] | IH CD97, qRT-PCR (n=54 patients)                                                                                                              | ADGRE5 correlates to pT stage                                                                                                    |
| prostate    | prostate Ca                  | [17] | IH CD97 tissue array, qRT-PCR                                                                                                                 | ↑CD97 in prostatic intraepithelial neoplasia, primary and metastatic prostate cancer vs normal                                   |
|             | prostate adeno Ca            | [18] | IH CD97, tissue array (n=68 Ca, n=15 normal)                                                                                                  | normal CD97-, 59% Ca CD97+; CD97 and LPAR1 co-expressed in Ca                                                                    |
|             |                              | [18] | CD97ko (shRNA) in DU145 cells, transwell chamber invasion                                                                                     | CD97ko ↓invasion (LPAR1-dependent) and ↓LPA-dependent signaling to RHO and ERK activation                                        |
|             |                              | [18] | <i>in vivo</i> xenograft model using CD97Ko PC3 cells                                                                                         | ↓bone metastasis, unchanged sc tumor growth                                                                                      |
| ovary       | ovarian high-grade serous Ca | [19] | proteomes <sup>#</sup> of paired primary and recurrent post-chemotherapy Ca (n=9)                                                             | CD97 is one protein ↑ in recurrent compared with primary tumors                                                                  |
|             | ovarian Ca                   | [20] | <i>in vivo</i> xenograft model of SKOV3 or OVCAR3 cells pre-enriched for stem-like cells                                                      | CD97 is 1/5 CD markers ↑ in cancer stem-like vs. parental cells                                                                  |
|             |                              | [21] | methyloomics and genomics datasets; TCGA (n= 391 patients)                                                                                    | ADGRE5 is 1/4 highly methylated genes associated with poor progression-free survival (unclear whether tumor and/or immune cells) |
|             |                              | [22] | <i>in vitro</i> cancer cell lines; tumor transendothelial migration assay, medium BME cell invasion assay, stimulation with recombinant hCD55 | LPS or paclitaxel-resistance ↑CD97 through ↓miR-503-5p (targeting ADGRE5 3'-UTR); ↑migration and invasion                        |
| breast      | breast Ca                    | [23] | <i>in vitro</i> , miR-126 overexpression in MDA-MB-231 cells, proteome                                                                        | CD97 is a direct target of tumor suppressor miR-126, which is often ↓in tumors                                                   |
| oral cavity | OSCC                         | [24] | IH CD97, qRT-PCR (n=78 OSCC, n=10 normal oral mucosa)                                                                                         | CD97 is a marker of dedifferentiated OSCC; normal oral mucosa: basal layer CD97+                                                 |

Ca carcinoma, ccRCC clear cell renal cell Ca, HCC hepatocellular carcinoma, IH immunohistology, IH(C) cryosections, IH(P) paraffin-embedded, OSCC oral squamous cell carcinoma, PDCA pancreatic ductal adenocarcinoma

\*CIEF/Nano-RPLC: papillary isoelectric focusing/nano-reversed phase liquid chromatography

\*\*combined BONCAT (bioorthogonal non-canonical amino acid tagging) and SILAC (stable isotope labeling by amino acid in cell culture)

Table S2. CD97 in GBMs

| <b>literature</b> | <b>method</b>                                                                                                              | <b>result/conclusion</b>                                                                     |
|-------------------|----------------------------------------------------------------------------------------------------------------------------|----------------------------------------------------------------------------------------------|
| [25]              | <i>in vitro</i> , transcriptome after WT1Ko (siRNA) in GBM cell lines                                                      | WT1Ko ↓invasiveness and ↓ <i>ADGRE5</i>                                                      |
| [26]              | <i>in vitro</i> , transcriptome after CD97Ko (siRNA) in GBM cell lines                                                     | CD97Ko ↓migration and invasion; proliferation unchanged                                      |
| [26]              | transcriptome GBM cohort (TCGA n= 539 patients)                                                                            | <i>ADGRE5</i> has prognostic significance                                                    |
| [27]              | GBM xenograft model plus iv. delivered phage peptide library; tumor-derived GICs are analyzed for bound peptides           | CD97 is a potential biomarker for GICs                                                       |
| [28]              | <i>in vitro</i> , invadopodia assay (9 GBM cell lines), MS-based proteomic analyses                                        | CD97 is enriched in invadopodia                                                              |
| [28]              | transcriptome of GBM cohorts (TCGA n=539, REMBRANDT n= 187 patients)                                                       | <i>ADGRE5</i> has prognostic significance                                                    |
| [29]              | WB, qRT-PCR in glioma samples                                                                                              | CD97 present in GBMs but not astrocytomas (WHO II, III)                                      |
| [29]              | transcriptome GBM cohort (TCGA)                                                                                            | ↑ <i>ADGRE5</i> in classical/mesenchymal, not neural/proneural GBM subtypes                  |
| [30]              | <i>in vitro</i> , primary patient-derived glioma stem cells (n=5 patients), manipulation CD97 level; correlation to clinic | CD97Ko ↓invasion rate, CD97 overexpression ↑invasion rate                                    |
| [31]              | CD97Ko (siRNA) in GBM cell lines, screening for CD97-regulated pathways                                                    | CD97Ko ↓PI3K/AKT and MAPK/ERK signaling (transcriptomic data)<br>CD97Ko ↓AKT activation (WB) |

GIC glioma-initiating cell, MS mass-spectrometry, REMBRANDT Repository of Molecular Brain Neoplasia Data, TCGA The Cancer Genome Atlas, WB Western Blot analysis, WT1 Wilms tumor 1

Table S3. CD97 in hematopoietic malignancies

| leukemia | literature | methods, number of patients/controls                                                                                     | results/conclusion                                                                                                                                 |
|----------|------------|--------------------------------------------------------------------------------------------------------------------------|----------------------------------------------------------------------------------------------------------------------------------------------------|
| ALL      | [32]       | mRNA microarray of lymphoblasts (n= 270 childhood ALL) to normal B-cell progenitors                                      | CD97 is 1/30 genes differentially expressed by > 3-fold in at least 25% of ALL cases                                                               |
|          | [32]       | conformation by flow cytometry (n= 200 B-lineage ALL, n= 61 nonleukemic BM)                                              | CD97 is 1/22 antigens differentially expressed in up to 81.4% of ALL, especially in hyperdiploid                                                   |
| BCP-ALL  | [33]       | leukemia xenograft model (n=19 patients); analysis surface proteome by Cell Surface Capture (CSC) technology             | CD97 is a (new) leukemia-associated marker                                                                                                         |
|          | [33]       | conformation by flow cytometry (a.o. n=86 patients)                                                                      | CD97 is 1/4 CD antigens accounting for the most informative differences between normal and malignant cells                                         |
|          | [34]       | flow cytometry (n=84 B-lineage ALL, n=15 controls/ B cell precursors)                                                    | CD97 is part of a panel to detect minimal residual disease in childhood ALL                                                                        |
|          | [35]       | mRNA microarray (n=5 BCP-ALL; n=5 normal BM); flow cytometric analyses (n=63 BCP-ALL)                                    | CD97 overexpression in pediatric ALL; CD97 not essential for ALL proliferation and engraftment                                                     |
| AML      | [36]       | leukemia xenograft model (n= 61 patients)                                                                                | identification of a primary LSC gene signature                                                                                                     |
|          | [36]       | transcriptomic analysis 2 independent array platforms, evaluation of candidates by flow cytometry                        | CD97 enriched in LSC compared with HSC                                                                                                             |
|          | [37]       | proteomics by nano-LC-MS/MS, combined with transcriptomics                                                               | identification of CD97 to be associated with AML                                                                                                   |
|          | [38]       | flow cytometry (n= primary 385 AML, n=10 normal BM, n=15 MDS)                                                            | ↑CD97 in 208/285 AML, accompanied by ↑BM blast count and ↑FLT3 mutations                                                                           |
|          | [39]       | flow cytometry of LSC with defined markers (AML at diagnosis and relapse n=25 patients); leukemia xenograft model        | no change of CD97 between diagnosis and relapse                                                                                                    |
|          | [40]       | NGS transcriptome GPCRs (n=148 AML; normal blood and BM cell populations )                                               | CD97 is 1/30 AML-overexpressed GPCRs                                                                                                               |
|          | [41]       | transcriptome, genome wide gene expression (mRNA microarray) of AML cells (n=157 patients) with normal myeloblasts       | CD97 is 1/22 markers aberrantly expressed in AML                                                                                                   |
|          | [41]       | flow cytometry (n=240 AML patients); machine-learning algorithm                                                          | markers (including CD97) allow minimal residual disease (MRD) monitoring                                                                           |
|          | [42]       | TCGA transcriptomic data re-analysis (n=173 AML)                                                                         | high ADGRE5 expression is associated with poor overall survival                                                                                    |
|          | [43]       | metaanalysis of transcriptomic data (gex.riken.jp/), conformation by flow cytometry (n=30 patients) and other approaches | ADGRE5 is overexpressed in LSC-enriched cells; CD97 is higher in enriched LSCs compared to HSCs; high levels of CD97 correlate with poor prognosis |
|          | [43]       | experimental: CD97Ko by shRNA in AML cell lines, xenotransplantation                                                     | CD97Ko ↓disease aggressiveness <i>in vivo</i>                                                                                                      |
|          | [43]       | CD97Ko in AML cell lines (HL-60, U937)                                                                                   | CD97Ko ↑proliferation, ↓apoptosis, ↓AML blast differentiation                                                                                      |
|          | [44]       | transcriptomic data re-analysis only for aGPCRs                                                                          | ↑ADGRE5 is associated with ↓overall survival                                                                                                       |
|          | [45]       | TCGA transcriptomic data re-analysis (n=167 AML)                                                                         | ADGRE5 levels part of a mRNA and lncRNAs profile with a role in prognosis and risk stratification                                                  |
|          | [46]       | routine flow cytometry plus 7 potential AML markers (n=256 AML, n=11 normal BM)                                          | CD97 part of a pipeline for diagnosis, MRD detection and clonal tracking AML                                                                       |
| CLL      | [47]       | <i>in vitro</i> , CLL culture with fibroblasts; DotScan™ antibody microarray to identify changed CD antigens             | CD97 is 1/25 changed CD antigens; ibrutinib or idelalisib countered the change of CD97                                                             |

ALL acute lymphoblastic leukemia, AML acute myeloid leukemia, CLL chronic lymphocytic leukemia, BCP-ALL B-cell precursor ALL, BM bone marrow, CD cluster of differentiation, HSC hematopoietic stem cell, LC-MS/MS liquid chromatography/tandem mass spectrometry, lncRNA long non-coding RNA, LSC leukemic stem cells, MDR minimal residual disease, MDS myelodysplastic syndrome, NGS next generation sequencing, The Cancer Genome Atlas (TCGA)

Table S4. sCD97 in human body fluids

| body fluid            | literature | number patients, normals                                                                  | method                   | CD97 Abs used                                                  | result                                                                     |
|-----------------------|------------|-------------------------------------------------------------------------------------------|--------------------------|----------------------------------------------------------------|----------------------------------------------------------------------------|
| serum, plasma         | [48]       | normals                                                                                   | IP, WB                   | polyclonal Ab, N-terminus                                      | sCD97-negative                                                             |
| synovial fluid        | [48]       | inflammatory arthritis (n=12)                                                             | IP, WB                   | polyclonal Ab, N-terminus                                      | sCD97 in body fluids is related to inflammation                            |
| synovial fluid        | [49]       | rheumatoid arthritis (RA, n=30), osteoarthritis (OA, n=13), reactive arthritis (RA, n=10) | self-made sandwich ELISA | capture Ab: MEM-180 (GAIN); detection Ab CLB-CD97/1 (EGF-like) | sCD97 higher in RA than in OA and reactive arthritis                       |
| serum                 | [4]        | colorectal cancer (n=81), normal (n=26)                                                   | self-made sandwich ELISA | as [49]                                                        | no difference between patients and normals                                 |
|                       | [50]       | colorectal (n=11), pancreatic (n=11), breast cancer (n=15), normal (n=30)                 | self-made sandwich ELISA | capture monoclonal Ab VIM3C (EGF-like), detection Ab 8-154     | ↑sCD97 in cancer patients                                                  |
| bile                  | [7]        | intrahepatic cholangiocarcinoma (n=71), hepatolithiasis (n=10)                            | self-made sandwich ELISA | as [49]                                                        | sCD97 independent risk factor for survival, predicts lymph node metastasis |
| pleural effusion (PE) | [51]       | malignant PE (n=51), tuberculous PE (n=55)                                                | commercial ELISA         | unclear                                                        | sCD97 tuberculous > malignant PE                                           |

Ab antibody, WB Western Blotting, IP immunoprecipitation

Table S5. CD97-dependent cellular functions in tumors

| cellular function                        | literature | methods                                                                                                                                       | result                                                                                                                |
|------------------------------------------|------------|-----------------------------------------------------------------------------------------------------------------------------------------------|-----------------------------------------------------------------------------------------------------------------------|
| apoptosis                                | [52]       | <i>in vitro</i> CD97Ko (lentiviral) and stable ectopic CD97 in fibrosarcoma HT1080 cells, apoptosis assays                                    | CD97Ko ↑apoptosis, ectopic CD97 ↓apoptosis; depends on GPS-cleavage                                                   |
| apoptosis                                | [43]       | CD97Ko (shRNA) in AML cell lines (HL-60, U937), apoptosis and proliferation assays                                                            | CD97Ko ↓proliferation by ↑apoptosis                                                                                   |
| stem cell maintenance                    | [43]       | CD97Ko (shRNA) in AML cell lines (HL-60, MOLM13), quantitation myeloid markers                                                                | CD97Ko ↑AML blast differentiation                                                                                     |
| proliferation, apoptosis                 | [53]       | edited miRNA-379-5p inhibits proliferation and promotes apoptosis, screening for target genes                                                 | ADGRE5 is the a major target gene through which these functions of edited miRNA-379-5p are mediated                   |
| proliferation                            | [54]       | CD97Ko in gastric SGC-7901 cells, isolation and application of exosomes                                                                       | exosomes of WT, not CD97Ko cells ↑proliferation (activating MAPK signaling)                                           |
| tumor growth                             | [55]       | <i>scid</i> mouse model, xenotransplantation of fibrosarcoma HT1080 cells with ectopic CD97                                                   | CD97 accelerates initiation of tumor growth but not growth velocity; depends on CD97 EGF-like repeats and 7TM         |
| angiogenesis                             | [56]       | directed <i>in vivo</i> angiogenesis assay (DIVAA) in mice                                                                                    | NTF of CD97(125) promotes tumor angiogenesis                                                                          |
| angiogenesis                             | [56]       | subcutaneous tumor induction with ectopic CD97 NIH-3T3 cells in mice                                                                          | CD97(EGF1-5) ↑vascularization of developing tumors                                                                    |
| migration (directed)                     | [4]        | <i>in vitro</i> , transwell chamber assay (serum); colorectal tumor cell lines (n=15)                                                         | migration correlates with the CD97 level at the cell surface                                                          |
| migration (non- directed)                | [55]       | <i>in vitro</i> , quantitation of covered distances, fibrosarcoma HT1080 cells stable overexpressing CD97                                     | CD97 ↑single cell migration; depends on EGF-like repeats and 7TM                                                      |
| migration/ invasion                      | [57]       | CD97 overexpression in BGC-823 gastric cancer cells                                                                                           | CD97(EGF125) ↑motile and invasive ability                                                                             |
| migration/invasion (directed)            | [18]       | <i>in vitro</i> , transwell chamber assay (serum); CD97Ko (shRNA) in prostate DU145 cancer cells                                              | CD97Ko ↓migration/invasion                                                                                            |
| migration/ invasion                      | [26]       | <i>in vitro</i> , transcriptome after CD97Ko (siRNA) in GBM cell lines                                                                        | CD97Ko ↓migration and invasion; proliferation unchanged                                                               |
| migration (directed)                     | [38]       | <i>in vitro</i> , transwell chamber assay (serum and LPA); CD97Ko (shRNA) in AML MV4-11 cells                                                 | CD97Ko ↓migration/invasion                                                                                            |
| adhesion, migration, invasion/metastasis | [58]       | a.o. breast Mvt-1 and prostate DU145/Ras cells (WT vs. CD97Ko, pretreated with platelets) xenotransplantation, lung and bone metastasis assay | platelets (activated by CD97 on tumor cells) release LPA which binds to CD97-LPAR complex at tumor cells; ↑metastasis |
| migration/invasion                       | [22]       | ovarian cancer cell lines; tumor transendothelial migration assay, medium BME cell invasion assay, stimulation with recombinant hCD55         | LPS-stimulation or paclitaxel-resistance ↑CD97 through ↓miR-503-5p                                                    |
| migration/ invasion                      | [6]        | <i>in vitro</i> , wounding and transwell chamber assays; stable CD97Ko in HCC SMM-7721 cells, stable ectopic CD97 in HCC Huh-1 cells          | CD97 ↑migration and invasion in presence of CD55                                                                      |
| invasion                                 | [28]       | <i>in vitro</i> , invadopodia assay (9 GBM cell lines), MS-based proteomic analyses                                                           | CD97 is enriched in invadopodia                                                                                       |
| invasion                                 | [30]       | <i>in vitro</i> , primary patient-derived glioma stem cells (n=5 patients), manipulation CD97 level                                           | CD97Ko ↓invasion rate, CD97 overexpression ↑invasion rate                                                             |
| detachment                               | [59]       | fibrosarcoma HT1080 cells with ectopic CD97 or CD97ΔPBM, shear-stress application                                                             | CD97 regulates detachment via the PBM                                                                                 |
| deformability                            | [59]       | CD97Ko (by CRISPR-Cas) in breast MDA-MB-321 cells, optical stretching of single cells                                                         | ↑deformability in CD97Ko clones compared to WT                                                                        |

AML acute myeloblastic leukemia; HCC hepatocellular carcinoma, IH immunohistology, in situ (using human tissues)

## References

1. Aust, G.; Steinert, M.; Schütz, A.; Wahlbuhl, M.; Hamann, J.; Wobus, M. CD97, but not its closely related EGF-TM7 family member EMR2, is expressed on gastric, pancreatic and esophageal carcinomas. *Am. J. Clin. Pathol.* **2002**, *118*, 699–707.
2. Singh, V.; Singh, L.C.; Vasudevan, M.; Chattopadhyay, I.; Borthakar, B.B.; Rai, A.K.; Phukan, R.K.; Sharma, J.; Mahanta, J.; Kataki, A.C.; et al. Esophageal cancer epigenomics and integrome analysis of genome-wide methylation and expression in high risk northeast indian population. *OMICS*. **2015**, *19*, 688–699.
3. Liu, Y.; Chen, L.; Peng, S.; Chen, Z.; Gimm, O.; Finke, R.; Hoang-Vu, C. The expression of CD97EGF and its ligand CD55 on marginal epithelium is related to higher stage and depth of tumor invasion of gastric carcinomas. *Oncol. Rep.* **2005**, *14*, 1413–1420.
4. Steinert, M.; Wobus, M.; Boltze, C.; Schütz, A.; Wahlbuhl, M.; Hamann, J.; Aust, G. Expression and regulation of CD97 in colorectal carcinoma cell lines and tumor tissues. *Am. J. Pathol.* **2002**, *161*, 1657–1667.
5. Han, S.L.; Xu, C.; Wu, X.L.; Li, J.L.; Liu, Z.; Zeng, Q.Q. The impact of expressions of CD97 and its ligand CD55 at the invasion front on prognosis of rectal adenocarcinoma. *Int. J. Colorectal Dis.* **2010**, *25*, 695–702.
6. Yin, Y.; Xu, X.; Tang, J.; Zhang, W.; Zhangyuan, G.; Ji, J.; Deng, L.; Lu, S.; Zhuo, H.; Sun, B. CD97 promotes tumor aggressiveness through the traditional G protein-coupled receptor-mediated signaling in hepatocellular carcinoma. *Hepatology* **2018**, *68*, 1865–1878.
7. Meng, Z.-W.; Liu, M.-C.; Hong, H.-J.; Du, Q.; Chen, Y.-L. Expression and prognostic value of soluble CD97 and its ligand CD55 in intrahepatic cholangiocarcinoma. *Tumour Biol.* **2017**, *39*, 1010428317694319, doi:10.1177/1010428317694319.
8. Wu, J.; Lei, L.; Wang, S.; Gu, D.; Zhang, J. Immunohistochemical expression and prognostic value of CD97 and its ligand CD55 in primary gallbladder carcinoma. *J. Biomed. Biotechnol.* **2012**, *2012*, 587672. doi: 10.1155/2012/587672, doi:10.1155/2012/587672.
9. Boltze, C.; Schneider-Stock, R.; Aust, G.; Dralle, H.; Roessner, A.; Hoang-Vu, C. Fas, Fas-L and CD97 as distinction markers between chronic pancreatitis and pancreatic ductal adenocarcinoma in perioperative evaluation of cryocut sections. *Exp.Clin.Endocrinol.Diab.* **2002**, *110* (suppl.1), 57.
10. He, Z.; Wu, H.; Jiao, Y.; Zheng, J. Expression and prognostic value of CD97 and its ligand CD55 in pancreatic cancer. *Oncol. Lett.* **2015**, *9*, 793–797.
11. Santorelli, L.; Capitoli, G.; Chinello, C.; Piga, I.; Clerici, F.; Denti, V.; Smith, A.; Grasso, A.; Raimondo, F.; Grasso, M.; et al. In-pepth mapping of the urinary N-glycoproteome: distinct signatures of ccRCC-related progression. *Cancers (Basel)* **2020**, *12*, doi:10.3390/cancers12010239.
12. Aust, G.; Eichler, W.; Laue, S.; Lehmann, I.; Heldin, N.-E.; Lotz, O.; Scherbaum, W.A.; Dralle, H.; Hoang-Vu, C. CD97: A dedifferentiation marker in human thyroid carcinomas. *Cancer Res.* **1997**, *57*, 1798–1806.
13. Hoang-Vu, C.; Bull, K.; Schwarz, I.; Krause, G.; Schmutzler, C.; Aust, G.; Köhrle, J.; Dralle, H. Regulation of CD97 protein in thyroid carcinoma. *J. Clin. Endocrinol. Metab.* **1999**, *84*, 1104–1109.
14. Kang, H.J.; Youn, Y.-K.; Hong, M.-K.; Kim, L.S. Antiproliferation and redifferentiation in thyroid cancer cell lines by polyphenol phytochemicals. *J. Korean Med. Sci.* **2011**, *26*, 893–899, doi:10.3346/jkms.2011.26.7.893.
15. Ward, Y.; Lake, R.; Martin, P.L.; Killian, K.; Salerno, P.; Wang, T.; Meltzer, P.; Merino, M.; Cheng, S.Y.; Santoro, M.; et al. CD97 amplifies LPA receptor signaling and promotes thyroid cancer progression in a mouse model. *Oncogene*. **2013**, *32*, 2726–2738.
16. Mustafa, T.; Klonisch, T.; Hombach-Klonisch, S.; Kehlen, A.; Schmutzler, C.; Koehrl, J.; Gimm, O.; Dralle, H.; Hoang-Vu, C. Expression of CD97 and CD55 in human medullary thyroid carcinomas. *Int. J. Oncol.* **2004**, *24*, 285–294.

17. Loberg, R.D.; Wojno, K.J.; Day, L.L.; Pienta, K.J. Analysis of membrane-bound complement regulatory proteins in prostate cancer. *Urology*. **2005**, *66*, 1321–1326.
18. Ward, Y.; Lake, R.; Yin, J.J.; Heger, C.D.; Raffeld, M.; Goldsmith, P.K.; Merino, M.; Kelly, K. LPA receptor heterodimerizes with CD97 to amplify LPA-initiated RHO-dependent signaling and invasion in prostate cancer cells. *Cancer Res.* **2011**, *71*, 7301–7311.
19. Jinawath, N.; Vasoontara, C.; Jinawath, A.; Fang, X.; Zhao, K.; Yap, K.-L.; Guo, T.; Lee, C.S.; Wang, W.; Balgley, B.M.; et al. Oncoproteomic analysis reveals co-upregulation of RELA and STAT5 in carboplatin resistant ovarian carcinoma. *PLoS. ONE*. **2010**, *5*, e11198, doi:10.1371/journal.pone.0011198.
20. Lee, Y.-J.; Wu, C.-C.; Li, J.-W.; Ou, C.-C.; Hsu, S.-C.; Tseng, H.-H.; Kao, M.-C.; Liu, J.-Y. A rational approach for cancer stem-like cell isolation and characterization using CD44 and prominin-1(CD133) as selection markers. *Oncotarget* **2016**, *7*, 78499–78515, doi:10.18632/oncotarget.12100.
21. Chang, P.-Y.; Liao, Y.-P.; Wang, H.-C.; Chen, Y.-C.; Huang, R.-L.; Wang, Y.-C.; Yuan, C.-C.; Lai, H.-C. An epigenetic signature of adhesion molecules predicts poor prognosis of ovarian cancer patients. *Oncotarget* **2017**, *8*, 53432–53449, doi:10.18632/oncotarget.18515.
22. Park, G.B.; Kim, D. MicroRNA-503-5p inhibits the CD97-mediated JAK2/STAT3 pathway in metastatic or paclitaxel-resistant ovarian cancer cells. *Neoplasia* **2019**, *21*, 206–215, doi:10.1016/j.neo.2018.12.005.
23. Lu, Y.Y.; Sweredoski, M.J.; Huss, D.; Lansford, R.; Hess, S.; Tirrell, D.A. Prometastatic GPCR CD97 is a direct target of tumor suppressor microRNA-126. *ACS Chem. Biol.* **2013**, *9*, 334–338.
24. Mustafa, T.; Eckert, A.; Klonisch, T.; Kehlen, A.; Maurer, P.; Klintschar, M.; Erhuma, M.; Zschoyan, R.; Gimm, O.; Dralle, H.; et al. Expression of the epidermal growth factor seven-transmembrane member CD97 correlates with grading and staging in human oral squamous cell carcinomas. *Cancer Epidemiol. Biomarkers Prev.* **2005**, *14*, 108–119.
25. Chidambaram, A.; Fillmore, H.L.; van Meter, T.E.; Dumur, C.I.; Broaddus, W.C. Novel report of expression and function of CD97 in malignant gliomas: correlation with Wilms tumor 1 expression and glioma cell invasiveness. *J. Neurosurg.* **2012**, *116*, 843–853.
26. Safaee, M.; Clark, A.J.; Oh, M.C.; Ivan, M.E.; Bloch, O.; Kaur, G.; Sun, M.Z.; Kim, J.M.; Oh, T.; Berger, M.S.; et al. Overexpression of CD97 confers an invasive phenotype in glioblastoma cells and is associated with decreased survival of glioblastoma patients. *PLoS. ONE*. **2013**, Apr 26;8(4):e62765. doi: 10.1371/journal.pone.0062765, doi:10.1371/journal.pone.0062765.
27. Liu, J.K.; Lubelski, D.; Schonberg, D.L.; Wu, Q.; Hale, J.S.; Flavahan, W.A.; Mulkearns-Hubert, E.E.; Man, J.; Hjelmeland, A.B.; Yu, J.; et al. Phage display discovery of novel molecular targets in glioblastoma-initiating cells. *Cell Death. Differ.* **2014**, *21*, 1325–1339.
28. Mallawaarachy, D.M.; Buckland, M.E.; McDonald, K.L.; Li, C.C.; Ly, L.; Sykes, E.K.; Christopherson, R.I.; Kaufman, K.L. Membrane proteome analysis of glioblastoma cell invasion. *J. Neuropathol. Exp. Neurol.* **2015**, *74*, 425–441.
29. Safaee, M.; Fakurnejad, S.; Bloch, O.; Clark, A.J.; Ivan, M.E.; Sun, M.Z.; Oh, T.; Phillips, J.J.; Parsa, A.T. Proportional upregulation of CD97 isoforms in glioblastoma and glioblastoma-derived brain tumor initiating cells. *PLoS. ONE*. **2015**, *10*, e0111532.
30. Eichberg, D.G.; Slepak, T.I.; Pascoini, A.L.; Komotar, R.J.; Ivan, M.E. Genetic manipulation of adhesion GPCR CD97/ADGRE5 modulates invasion in patient-derived glioma stem cells. *J. Neurooncol.* **2021**, *153*, 383–391, doi:10.1007/s11060-021-03778-8.
31. Safaee, M.M.; Wang, E.J.; Jain, S.; Chen, J.-S.; Gill, S.; Zheng, A.C.; Garcia, J.H.; Beniwal, A.S.; Tran, Y.; Nguyen, A.T.; et al. CD97 is associated with mitogenic pathway activation, metabolic reprogramming, and immune microenvironment changes in glioblastoma. *Sci. Rep.* **2022**, *12*, 1464, doi:10.1038/s41598-022-05259-y.
32. Coustan-Smith, E.; Song, G.; Clark, C.; Key, L.; Liu, P.; Mehrpooya, M.; Stow, P.; Su, X.; Shurtleff, S.; Pui, C.H.; et al. New markers for minimal residual disease detection in acute lymphoblastic leukemia. *Blood*. **2011**, *117*, 6267–6276.



33. Mirkowska, P.; Hofmann, A.; Sedek, L.; Slamova, L.; Mejstrikova, E.; Szczepanski, T.; Schmitz, M.; Cario, G.; Stanulla, M.; Schrappe, M.; et al. Leukemia surfaceome analysis reveals new disease-associated features. *Blood* **2013**, *121*, e149–e159.
34. Baraka, A.; Sherief, L.M.; Kamal, N.M.; Shorbagy, S.E. Detection of minimal residual disease in childhood B-acute lymphoblastic leukemia by 4-color flowcytometry. *Int. J. Hematol.* **2017**, *105*, 784–791, doi:10.1007/s12185-017-2206-4.
35. Diamanti, P.; Cox, C.V.; Ede, B.C.; Uger, R.A.; Moppett, J.P.; Blair, A. Targeting pediatric leukemia-propagating cells with anti-CD200 antibody therapy. *Blood Adv.* **2021**, *5*, 3694–3708, doi:10.1182/bloodadvances.2020003534.
36. Saito, Y.; Kitamura, H.; Hijikata, A.; Tomizawa-Murasawa, M.; Tanaka, S.; Takagi, S.; Uchida, N.; Suzuki, N.; Sone, A.; Najima, Y.; et al. Identification of therapeutic targets for quiescent, chemotherapy-resistant human leukemia stem cells. *Sci. Transl. Med.* **2010**, *2*, 17ra9, doi:10.1126/scitranslmed.3000349.
37. Bonardi, F.; Fusetti, F.; Deelen, P.; van, G.D.; Vellenga, E.; Schuringa, J.J. A proteomics and transcriptomics approach to identify leukemic stem cell (LSC) markers. *Mol. Cell Proteomics.* **2013**, *12*, 626–637.
38. Wobus, M.; Bornhauser, M.; Jacobi, A.; Krater, M.; Otto, O.; Ortlepp, C.; Guck, J.; Ehninger, G.; Thiede, C.; Oelschlagel, U. Association of the EGF-TM7 receptor CD97 expression with FLT3-ITD in acute myeloid leukemia. *Oncotarget* **2015**, *6*, 38804–38815.
39. Ho, T.-C.; LaMere, M.; Stevens, B.M.; Ashton, J.M.; Myers, J.R.; O'Dwyer, K.M.; Liesveld, J.L.; Mendler, J.H.; Guzman, M.; Morrisette, J.D.; et al. Evolution of acute myelogenous leukemia stem cell properties after treatment and progression. *Blood* **2016**, *128*, 1671–1678, doi:10.1182/blood-2016-02-695312.
40. Maiga, A.; Lemieux, S.; Pabst, C.; Lavallée, V.-P.; Bouvier, M.; Sauvageau, G.; Hébert, J. Transcriptome analysis of G protein-coupled receptors in distinct genetic subgroups of acute myeloid leukemia: identification of potential disease-specific targets. *Blood Cancer J.* **2016**, *6*, e431, doi:10.1038/bcj.2016.36.
41. Coustan-Smith, E.; Song, G.; Shurtleff, S.; Yeoh, A.E.-J.; Chng, W.J.; Chen, S.P.; Rubnitz, J.E.; Pui, C.-H.; Downing, J.R.; Campana, D. Universal monitoring of minimal residual disease in acute myeloid leukemia. *JCI Insight* **2018**, *3*, doi:10.1172/jci.insight.98561.
42. Vaikari, V.P.; Yang, J.; Wu, S.; Alachkar, H. CD97 expression is associated with poor overall survival in acute myeloid leukemia. *Exp. Hematol.* **2019**, *75*, 64–73.e4, doi:10.1016/j.exphem.2019.06.474.
43. Martin, G.H.; Roy, N.; Chakraborty, S.; Desrichard, A.; Chung, S.S.; Woolthuis, C.M.; Hu, W.; Berezniuk, I.; Garrett-Bakelman, F.E.; Hamann, J.; et al. CD97 is a critical regulator of acute myeloid leukemia stem cell function. *J. Exp. Med.* **2019**.
44. Yang, J.; Wu, S.; Alachkar, H. Characterization of upregulated adhesion GPCRs in acute myeloid leukemia. *Transl. Res* **2019**, *212*, 26–35, doi:10.1016/j.trsl.2019.05.004.
45. Chen, C.-T.; Wang, P.-P.; Mo, W.-J.; Zhang, Y.-P.; Zhou, W.; Deng, T.-F.; Zhou, M.; Chen, X.-W.; Wang, S.-Q.; Wang, C.-X. Expression profile analysis of prognostic long non-coding RNA in adult acute myeloid leukemia by weighted gene co-expression network analysis (WGCNA). *J. Cancer* **2019**, *10*, 4707–4718, doi:10.7150/jca.31234.
46. Houtsma, R.; van der Meer, Nisha K.; Meijer, K.; Morsink, L.; Hogeling, S.M.; Woolthuis, C.; Ammatuna, E.; Nijk, M.; Boer, B. de; Huls, G.; et al. CombiFlow: Combinatorial AML-specific plasma membrane expression profiles allow longitudinal tracking of clones. *Blood Adv.* **2021**, doi:10.1182/bloodadvances.2021005018.
47. Shen, Y.; Best, O.G.; Mulligan, S.P.; Christopherson, R.I. Ibrutinib and idelalisib block immunophenotypic changes associated with the adhesion and activation of CLL cells in the tumor microenvironment. *Leuk. Lymphoma* **2018**, *59*, 1927–1937, doi:10.1080/10428194.2017.1403598.

48. Gray, J.X.; Haino, M.; Roth, M.J.; Maguire, J.E.; Jensen, P.N.; Yarme, A.; Stetler-Stevenson, M.A.; Siebenlist, U.; Kelly, K. CD97 is a processed, seven-transmembrane, heterodimeric receptor associated with inflammation. *J. Immunol.* **1996**, *157*, 5438–5447.
49. Hamann, J.; Wishaupt, J.O.; van Lier, R.A.; Smeets, T.J.; Breedveld, F.C.; Tak, P.P. Expression of the activation antigen CD97 and its ligand CD55 in rheumatoid synovial tissue. *Arthritis Rheum.* **1999**, *42*, 650–658.
50. Vogl, U.M.; Öhler, L.; Rasic, M.; Frischer, J.M.; Modak, M.; Stöckl, J. Evaluation of prognostic immune signatures in patients with breast, colorectal and pancreatic cancer receiving chemotherapy. *Anticancer Res* **2017**, *37*, 1947–1955, doi:10.21873/anticancer.11535.
51. Wang, C.; Jie, J.; Li, D.; Liu, Y.; Gao, J.; Song, L. Clinical value of CD97 and CD55 levels in the differential diagnosis of tuberculous and malignant pleural effusions. *Medicine* **2021**, *100*, e26771, doi:10.1097/MD.00000000000026771.
52. Hsiao, C.C.; Keysselt, K.; Chen, H.Y.; Sittig, D.; Hamann, J.; Lin, H.H.; Aust, G. The Adhesion GPCR CD97 inhibits apoptosis. *Int. J. Biochem. Cell Biol.* **2015**, *65*, 197–208.
53. Xu, X.; Wang, Y.; Mojumdar, K.; Zhou, Z.; Jeong, K.J.; Mangala, L.S.; Yu, S.; Tsang, Y.H.; Rodriguez-Aguayo, C.; Lu, Y.; et al. A-to-I-edited miRNA-379-5p inhibits cancer cell proliferation through CD97-induced apoptosis. *J Clin. Invest* **2019**, *129*, 5343–5356, doi:10.1172/JCI123396.
54. Li, C.; Liu, D.R.; Li, G.G.; Wang, H.H.; Li, X.W.; Zhang, W.; Wu, Y.L.; Chen, L. CD97 promotes gastric cancer cell proliferation and invasion through exosome-mediated MAPK signaling pathway. *World J. Gastroenterol.* **2015**, *21*, 6215–6228.
55. Galle, J.; Sittig, D.; Hanisch, I.; Wobus, M.; Wandel, E.; Loeffler, M.; Aust, G. Individual cell - based models of tumor - environment interactions. Multiple effects of CD97 on tumor invasion. *Am. J. Pathol.* **2006**, *169*, 1802–1811.
56. Wang, T.; Ward, Y.; Tian, L.; Lake, R.; Guedez, L.; Stetler-Stevenson, W.G.; Kelly, K. CD97, an adhesion receptor on inflammatory cells, stimulates angiogenesis through binding integrin counter receptors on endothelial cells. *Blood* **2004**, *105*, 2836–2844.
57. Liu, D.; Trojanowicz, B.; Radestock, Y.; Fu, T.; Hammje, K.; Chen, L.; Hoang-Vu, C. Role of CD97 isoforms in gastric carcinoma. *Int. J. Oncol.* **2010**, *36*, 1401–1408.
58. Ward, Y.; Lake, R.; Faraji, F.; Sperger, J.; Martin, P.; Gilliard, C.; Ku, K.P.; Rodems, T.; Niles, D.; Tillman, H.; et al. Platelets promote metastasis via binding tumor CD97 leading to bidirectional signaling that coordinates transendothelial migration. *Cell Rep.* **2018**, *23*, 808–822, doi:10.1016/j.celrep.2018.03.092.
59. Hilbig, D.; Sittig, D.; Hoffmann, F.; Rothmund, S.; Warnt, E.; Quaas, M.; Sturmer, J.; Seiler, L.; Liebscher, I.; Hoang, N.A.; et al. Mechano-dependent phosphorylation of the PDZ-binding motif of CD97/ADGRE5 modulates cellular detachment. *Cell Rep.* **2018**, *24*, 1986–1995.
